# Supplementary material for: Field Based Phenotyping for Stalk Lodging Resistance: Experimental Error Analysis
Source: Research Square preprint supplement (doi:10.21203/rs.3.rs-2548610/v1), 2023-02-08
Supplement: Supplementary file 1 [file bbc4418e0ad918bf430c42ba.xlsx]

## Sheet: Sheet1
		Horizontal Position (cm)	Vertical Position (%47cm Load Cell Height)	S Error (% mean)	EI Error (% mean)	S RSD (% mean)	EI RSD (% mean)
	Testing Position	-12.8	0	0.111465	-0.0503597	0.00250896	0.0113014
		-6.4	0	0.0557325	-0.0899281	0.00286678	0.0112211
		0	0	0.0111465	-0.158273	0.00515298	0.0204969
		6.4	0	-0.0270701	-0.251799	0.00651163	0.0140805
		12.8	0	-0.0923567	-0.316547	0.00932945	0.0243169
		-12.8	7.5	0.0923567	0.0467626	0.00421053	0.0124528
		-6.4	7.5	0.044586	-0.0107914	0.00316667	0.0106762
		0	7.5	-0.00477707	-0.118705	0.00316957	0.0205788
		6.4	7.5	-0.0509554	-0.176259	0.00409091	0.011315
		12.8	7.5	-0.122611	-0.266187	0.00808511	0.0369318
		-12.8	15	0.10828	0.158273	0.00446429	0.0042735
		-6.4	15	0.0477707	0.100719	0.00401338	0.01
		0	15	0	0	0.00334395	0.0255396
		6.4	15	-0.0700637	-0.0611511	0.0122024	0.019322
		12.8	15	-0.138535	-0.179856	0.00601399	0.0228659
