# Supplementary material for: Field Based Phenotyping for Stalk Lodging Resistance: Experimental Error Analysis
Source: Research Square preprint supplement (doi:10.21203/rs.3.rs-2548610/v1), 2023-02-08
Supplement: Supplementary file 2 [file da83556eb138b1498273b224.xlsx]

## Sheet: Sheet1
		Horizontal position (cm)	Vertical Position (% Load Cell Height)	S Error (%)					EI Error (%)
				32cm LCH	46cm LCH	47cm LCH	48cm LCH	62cm LCH	32cm LCH	46cm LCH	47cm LCH	48cm LCH	62cm LCH
		-6	0
	Testing Position	-6	0	-39.8695	-13.5624	-11.0564	-9.8042	16.5029	-51.2486	0.75676	5.07763	9.4167	82.9811
		-3	0	-36.0991	-8.16586	-5.49474	-4.14868	23.8079	-49.1795	4.667	8.96458	14.182	90.2572
		0	0	-33.0736	-3.79327	-0.99954	0.389626	29.6699	-45.7628	12.4268	16.0104	22.0462	104.062
		3	0	-30.5235	-0.12748	2.82338	4.39464	34.7126	-41.4421	21.863	25.3772	32.3454	120.848
		6	0	-26.0964	6.23641	9.3214	10.8554	43.1882	-37.6838	28.8894	31.9505	39.9081	133.83
		-6	7.5	-38.5948	-11.7237	-9.15722	-7.88561	18.9726	-55.6323	-8.19136	-4.54524	-0.474896	66.4173
		-3	7.5	-35.3246	-7.02908	-4.32931	-2.98687	25.3086	-53.0551	-3.10143	1.107	5.63589	76.2903
		0	7.5	-32.2019	-2.54028	0.456037	1.6971	31.6043	-47.5706	8.35321	12.1198	18.0858	96.5798
		3	7.5	-29.0077	2.05143	5.08329	6.47413	37.5291	-45.171	13.2586	17.6758	23.4203	105.703
		6	7.5	-24.0864	9.12587	12.2948	13.8705	47.0827	-40.3668	24.2226	26.6948	35.431	126.111
		-6	15	-39.6859	-13.2984	-10.7807	-9.5288	16.8586	-60.95	-19.1647	-15.7042	-12.086	46.5462
		-3	15	-35.5634	-7.37246	-4.74279	-3.34517	24.8458	-58.2846	-13.5897	-10.1082	-6.27446	56.895
		0	15	-32.3979	-2.82194	0	1.40319	30.9791	-53.2826	-3.94136	0	5.27727	75.9916
		3	15	-27.6625	3.98512	7.00473	8.50621	40.1539	-50.4143	3.14219	6.36063	11.8275	87.3238
		6	15	-22.9354	10.7804	13.9973	15.5969	49.3127	-44.6316	15.198	18.2287	25.9541	109.051
